# Supplementary material
Source: publisher site journal article supplement (https://www.spandidos-publications.com/1532/downloadSupplementary)
Supplement: Supplementary file 1 [file downloadSupplementary]

## Sheet: GEO Datasets
Table SI. Detailed information of the six GEO datasets in the present study.
ID	GSE	Total	Tumor	Normal	Platform	Platform Name	Publication	PMID
1	GSE16441	34	17	17	GPL6480	Agilent-014850 Whole Human Genome Microarray 4x44K G4112F (Probe Name version)	2011	20420713
2	GSE36895	46	23	23	GPL570	Affymetrix Human Genome U133 Plus 2.0 Array	2012	22683710
3	GSE40435	202	101	101	GPL10558	Illumina HumanHT-12 V4.0 expression beadchip	2013	23526956
4	GSE46699	130	65	65	GPL570	Affymetrix Human Genome U133 Plus 2.0 Array	2014	24479813
5	GSE66270	28	14	14	GPL570	Affymetrix Human Genome U133 Plus 2.0 Array	2016	26859141
6	GSE71963	30	15	15	GPL6480	Agilent-014850 Whole Human Genome Microarray 4x44K G4112F (Probe Name version)	2016	26790128
	Total	470	235	235
